# Supplementary material for: Machine Learning Methods for Diagnosing Autism Spectrum Disorder and Attention- Deficit/Hyperactivity Disorder Using Functional and Structural MRI: A Survey
Source: Front Neuroinform. 2021 Jan 20;14:575999. doi: 10.3389/fninf.2020.575999 (PMC7855595; doi:10.3389/fninf.2020.575999)
Supplement: Supplementary file 1 [file Data_Sheet_1.zip]

Archive with 8 entries (7 files):
- supplementary/
- supplementary/ae.png
- supplementary/CNN.png
- supplementary/GAN.png
- supplementary/k-dolf-holdout.png
- supplementary/RNN_LSTM.png
- supplementary/Supplementary_information.pdf
- supplementary/Supplementary_information.tex
